# Supplementary material for: Stability and electronic properties of gallenene
Source: Royal Society of Chemistry journal article supplement (doi:10.1039/d1na00553g), 2022-01-01
Supplement: d1na00553g1.pdf [file d1na00553g1.pdf]

# Supplementary information:

## Stability and electronic properties of gallenene

Alex Kutana,<sup>a</sup> Tariq Altalhi,<sup>b</sup> Qiyuan Ruan,<sup>a</sup> Jun-Jie Zhang,<sup>a</sup> Evgeni S. Penev,<sup>a</sup>  
and Boris I. Yakobson<sup>\*,b,c</sup>

*a Department of Materials Science and NanoEngineering, Rice University, Houston, Texas  
77005, United States*

*b Chemistry Department, Taif University, Taif 21974, Saudi Arabia*

*c Department of Chemistry, Rice University, Houston, Texas 77005, United States*

E-mail: [biy@rice.edu](mailto:biy@rice.edu)

# Interaction potential for gallene on unreconstructed Si(111) substrate

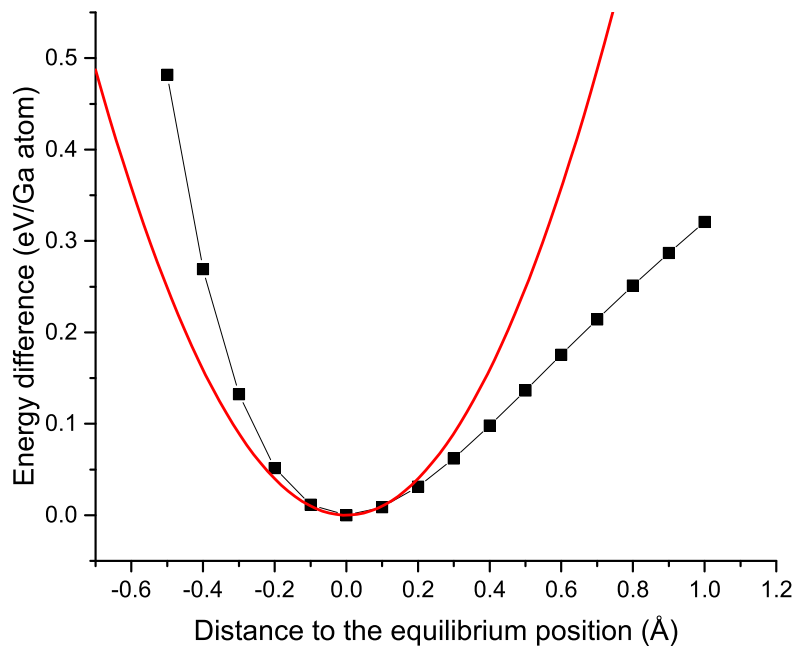

Figure S1: Interaction potential for gallene on unreconstructed Si(111) substrate calculated with DFT.

## Parameters for $T_c$ calculations in gallene

| structure             | $k$ -mesh      | $q$ -mesh      | $\omega_{\text{ln}}$ (K) | $\lambda$ | $T_c$ (K) |
|-----------------------|----------------|----------------|--------------------------|-----------|-----------|
| <b>14<sub>2</sub></b> | $28 \times 20$ | $28 \times 20$ | 63.4                     | 1.51      | 7.3       |
| <b>40</b>             | $32 \times 32$ | $16 \times 16$ | 91.5                     | 1.07      | 7.1       |
| <b>10</b>             | $21 \times 21$ | $7 \times 7$   | 82.3                     | 0.91      | 4.9       |
| <b>27</b>             | $24 \times 16$ | $12 \times 8$  | 86.6                     | 1.14      | 7.3       |

## Band structure of gallenene

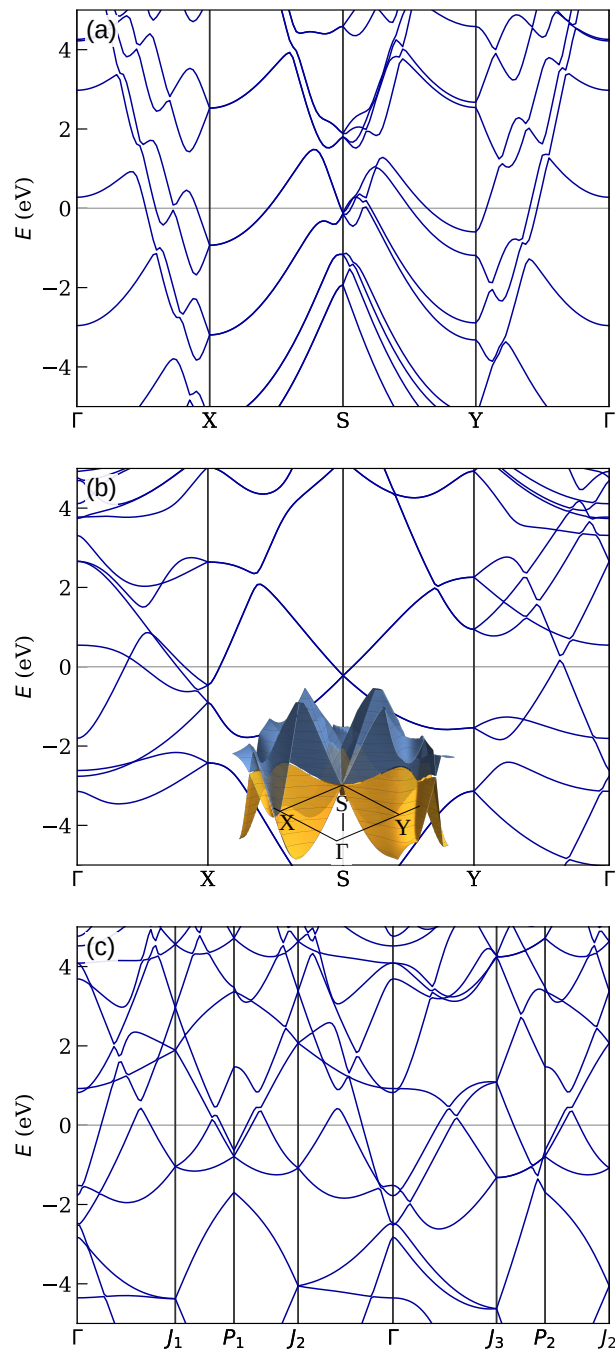

Figure S2: Electronic band structures of gallenene structures (a) **40**, (b) **14<sub>1</sub>**, and (c) **14<sub>2</sub>**. The inset in (b) shows the two bands that cross at the S point (rendered in the energy window  $E_F \pm 2$  eV and only over 3/4 of the Brillouin zone for clarity), indicating presence of a nodal line near the Fermi level.

## Electronic density of states

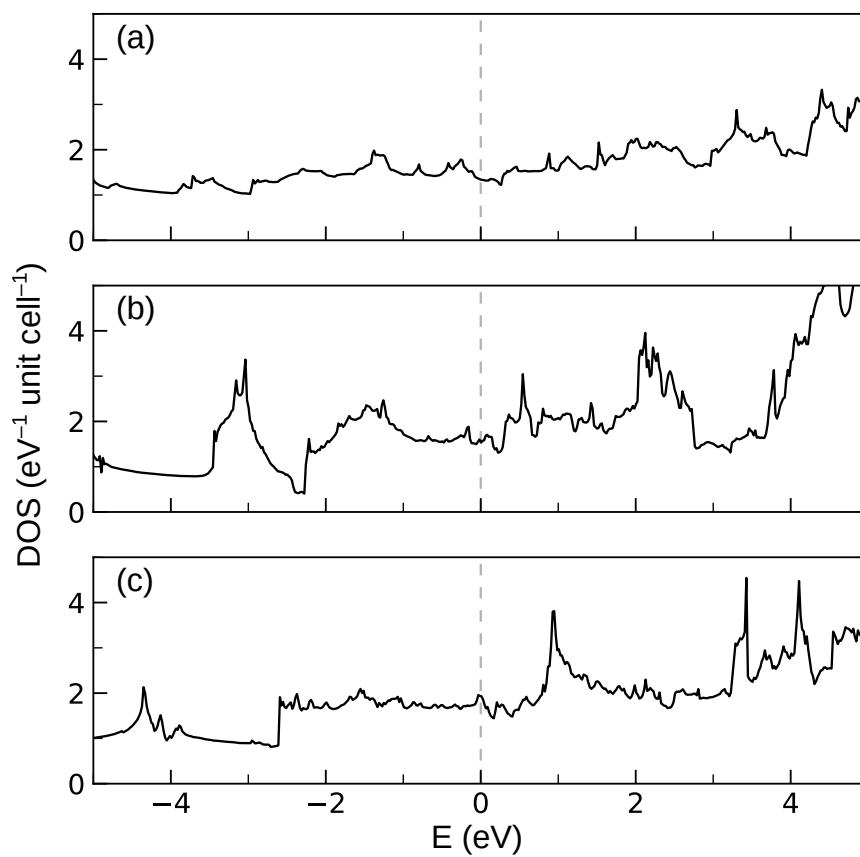

Figure S3: Electronic densities of states of gallene structures (a) **40**, (b) **14<sub>1</sub>**, and (c) **14<sub>2</sub>**.

## Gallenene structures 12 and 23

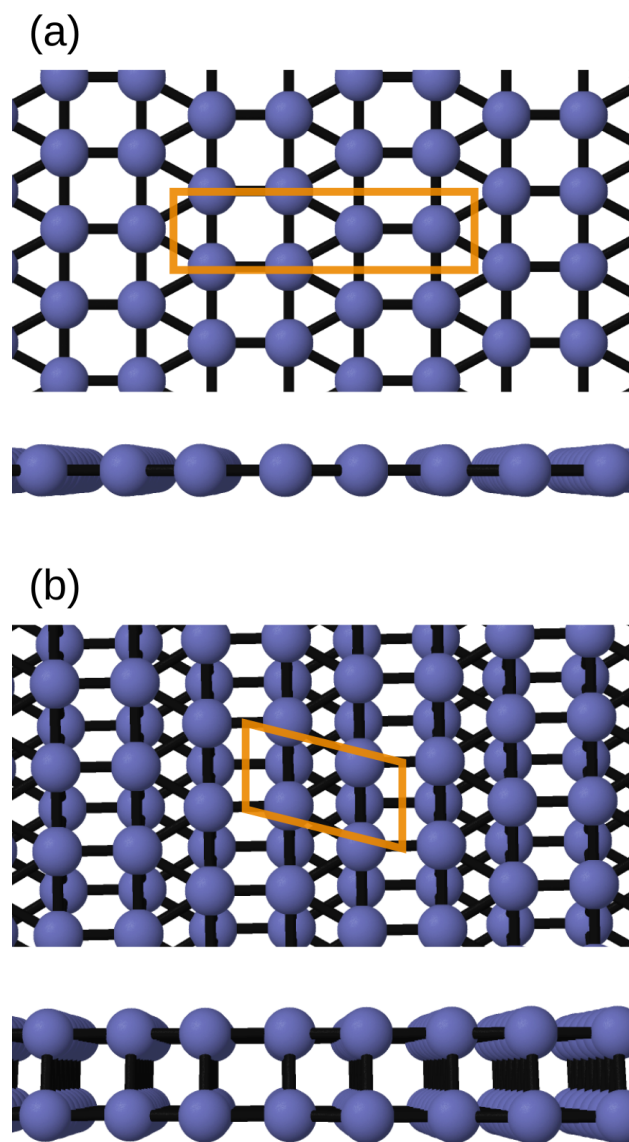

Figure S4: Gallenene structures (a) **12** and (b) **23**.

## Visualizations of unstable out-of-plane and in-plane phonon modes

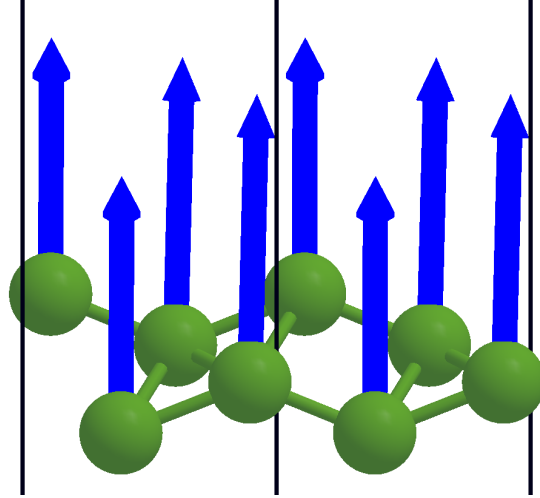

Figure S5: Visualization of the unstable out-of-plane phonon mode along  $\Gamma$ -X direction in Figure 3b of the main text.

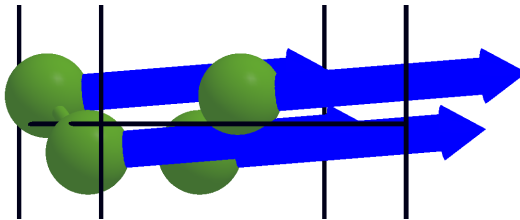

Figure S6: Visualization of the unstable in-plane phonon mode along  $\Gamma$ -J<sub>1</sub> direction in Figure 4b of the main text.
